# Supplementary material for: Dietary gamma-aminobutyric acid ameliorates growth impairment and intestinal dysfunction in turbot (Scophthalmus maximusL.) fed a high soybean meal diet
Source: Royal Society of Chemistry journal article supplement (doi:10.1039/d1fo03034e), 2021-11-23
Supplement: d1fo03034e1.pdf [file d1fo03034e1.pdf]

**Supplementary Table 1.** Cytokines contents in the plasma of turbot.

| Treatments | TNF- $\alpha$ (pg/mL)         | IL-1 $\beta$ (pg/mL)          | TGF- $\beta$ 1 (pg/mL)        |
|------------|-------------------------------|-------------------------------|-------------------------------|
| CNT        | 50.24 $\pm$ 0.55 <sup>a</sup> | 27.31 $\pm$ 0.65 <sup>a</sup> | 47.49 $\pm$ 0.80 <sup>a</sup> |
| HSD        | 68.74 $\pm$ 0.87 <sup>b</sup> | 36.92 $\pm$ 0.62 <sup>b</sup> | 35.01 $\pm$ 0.81 <sup>b</sup> |
| HSDG       | 52.61 $\pm$ 0.63 <sup>a</sup> | 29.33 $\pm$ 0.77 <sup>a</sup> | 44.83 $\pm$ 0.67 <sup>a</sup> |

Note: Values are displayed as means  $\pm$  standard error, n = 6; Different superscripted small letters in the same column mean significant difference ( $P < 0.05$ ).
